# Supplementary material for: Biological Activities of Some Isoquinoline Alkaloids from Fumaria schleicheri Soy. Will
Source: MDPI journal article supplement (doi:10.3390/plants11091202), 2022-04-29
Supplement: s1 [file s1]

Supplementary Materials

# Biological activities of some isoquinoline alkaloids from *Fumaria schleicheri* Soy. Will.

Ramona Păltinean <sup>1,#</sup>, Irina Ielciu <sup>1,\*</sup>, Daniela Hanganu <sup>2</sup>, Mihaela Niculae <sup>3</sup>, Eموke Pall <sup>3</sup>, Luc Angenot <sup>4</sup>, Monique Tits <sup>4</sup>, Andrei Mocan <sup>1</sup>, Mihai Babotă <sup>1,#</sup>, Oleg Frumuzachi <sup>1</sup>, Mircea Tămaş <sup>1</sup>, Gianina Crişan <sup>1</sup> and Michel Frederich <sup>4</sup>

<sup>1</sup> Department of Pharmaceutical Botany, “Iuliu Haţieganu” University of Medicine and Pharmacy Cluj-Napoca, 400010, Romania; rpaltinean@umfcluj.ro (R.P.); mocan.andrei@umfcluj.ro (A.M.); mihai.babota@umfcluj.ro (M.B.); oleg.frumuzachi@gmail.com (O.F.); mtbotanica@yahoo.com (M.T.); gcrisan@umfcluj.ro (G.C.)

<sup>2</sup> Department of Pharmacognosy, “Iuliu Haţieganu” University of Medicine and Pharmacy, Cluj-Napoca 400010, Romania; dhanganu@umfcluj.ro (D.H.)

<sup>3</sup> Department of Clinical Sciences, University of Agricultural Sciences and Veterinary Medicine Cluj-Napoca, 400374 Romania; mihaela.niculae@usamvcluj.ro (M.N.); emoke.pall@usamvcluj.ro (E.P.)

<sup>4</sup> Center of Interdisciplinary Research on Medicines, Laboratory of Pharmacognosy, University of Liège, 4000, Liège, Belgium; l.angenot@uliege.be (L.A.); m.tits@uliege.be (M.T.); M.Frederich@uliege.be (M.F.)

\* Correspondence: irina.ielciu@umfcluj.ro (I.I.)

# These authors contributed equally to this work

## S. Supplementary materials – Figures S1-S3

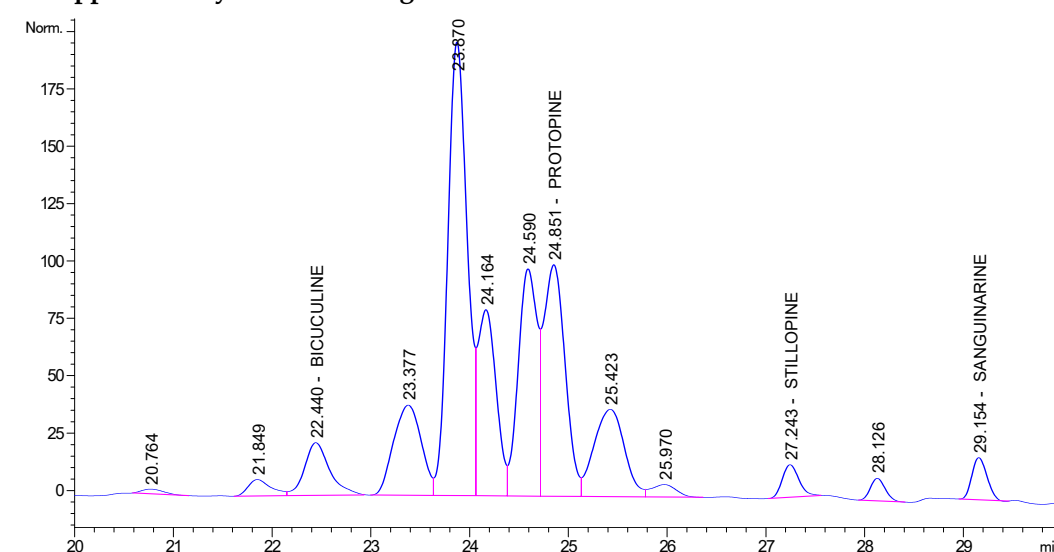

Figure S1. HPLC-DAD chromatogram of the FS1 sample

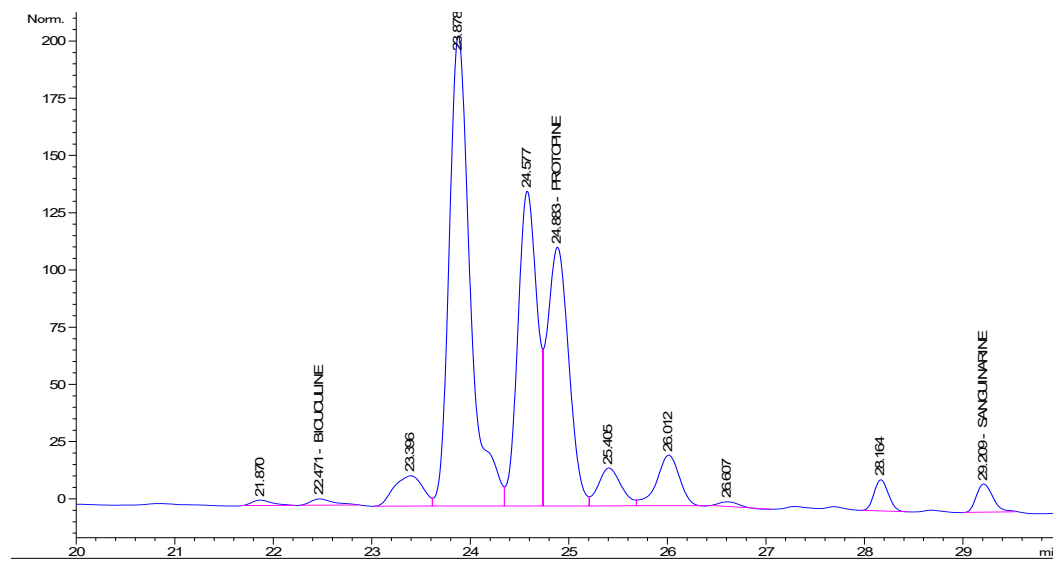

Figure S2. HPLC-DAD chromatogram of the FS2 sample

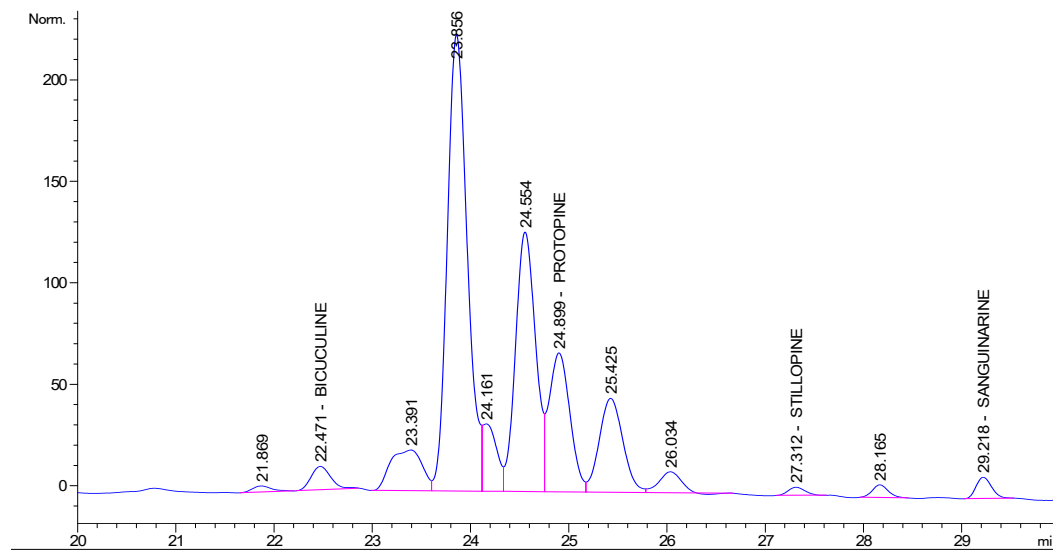

Figure S3. HPLC-DAD chromatogram of the FS3 sample

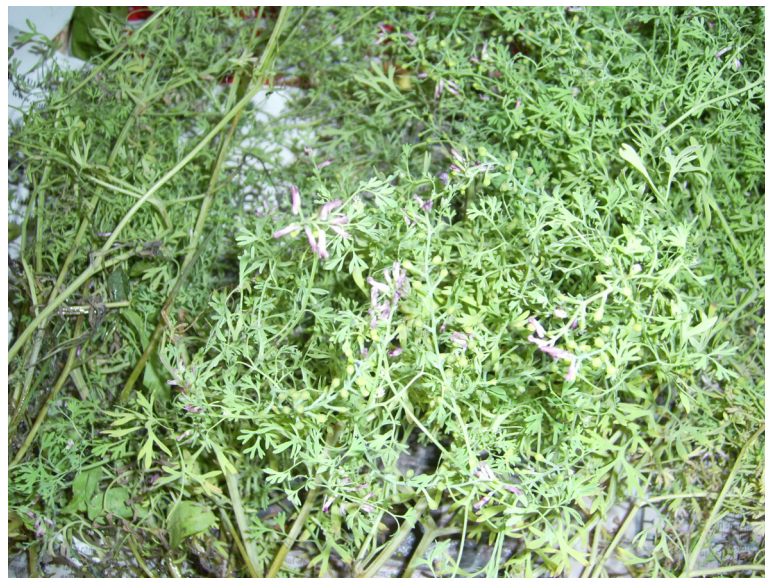

Figure S4. FS1 sample during the harvesting stage

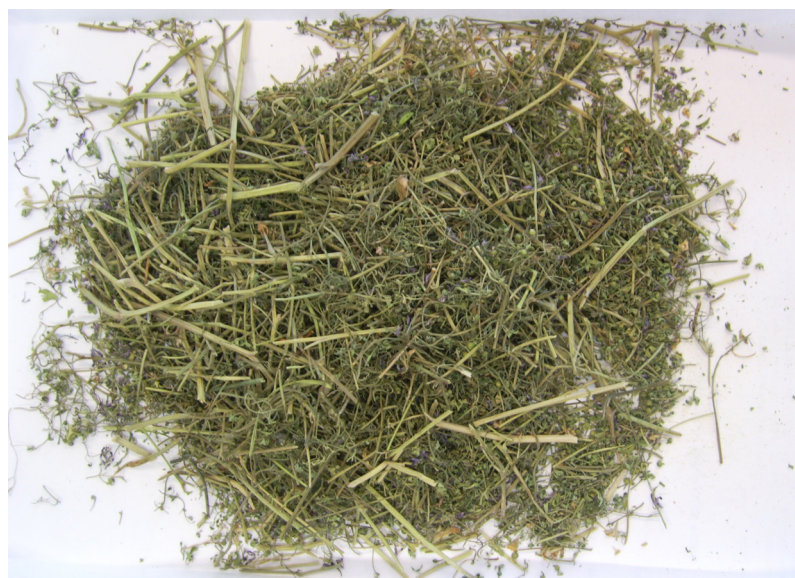

**Figure S5.** FS2 sample during the conditioning phase

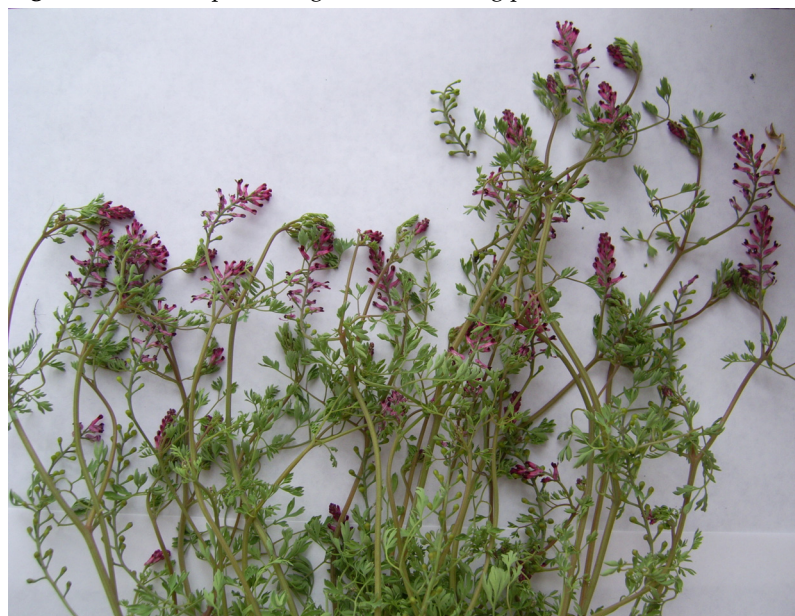

**Figure S6.** FS3 sample during the drying phase
